# Supplementary material for: Pathogen to commensal? Longitudinal within-host population dynamics, evolution, and adaptation during a chronic >16-year Burkholderia pseudomallei infection
Source: PLoS Pathog. 2020 Mar 5;16(3):e1008298. doi: 10.1371/journal.ppat.1008298 (PMC7077878; doi:10.1371/journal.ppat.1008298)
Supplement: S8 Table — (XLSX) [file ppat.1008298.s013.xlsx]

## Sheet: Sheet1
S8 Table: Phenotype data
Phylogenetic Order (Fig 4)	Phylogenetic Lineage (Fig 4)	MSHR ID	NAU ID	Days post first isolatea	Isolate source	Morphotype on Ashdown agar (GM-) after 72 hr	Multiple colony morphologies observed on Ashdown agar (GM-) after 72 hr	Growth on Luria-Bertani agar	Growth on M9 minimal agar	Motilityb	CPS production (AMD test)c	CPS production (Western)d	LPS production (Western)d	Gentamicin MIC µg/mLe ≤4=S, 8=I, ≥16=R	Ceftazidime MIC µg/mLf ≤8=S, 16=I, ≥32=R	Doxycycline MIC µg/mLf ≤4=S, 8=I, ≥16=R	Meropenem MIC µg/mLf ≤4=S, 8=I, ≥16=R	Amoxicillin Clavulanate MIC µg/mLf ≤8=S, 16=I, ≥32=R	Imipenem MIC µg/mLf ≤4=S, 8=I, ≥16=R	LPS production (silver stain)g
1	n/a	1498	Bp6741	917	environment; bore water tap	wild type	no	nt	nt	+	+	nt	nt	48	nt	nt	nt	nt	nt	nt
2	n/a	1436	Bp6739	758	environment; water	wild type	no	nt	nt	+	+	nt	nt	64	nt	nt	nt	nt	nt	nt
3	n/a	1450	Bp6740	758	environment; water	wild type	yes	nt	nt	+	+	nt	nt	16-64	nt	nt	nt	nt	nt	nt
4	n/a	1435	Bp6738	758	environment; water	wild type	yes	+	+	+	+	++	+	24	nt	nt	nt	nt	nt	nt
5	n/a	1887	Bp6745	1384	environment; filter bowl	wild type	no	nt	nt	+	+	nt	nt	64	nt	nt	nt	nt	nt	nt
6	n/a	1895	Bp6746	1384	environment; filter bowl	wild type	no	nt	nt	+	+	nt	nt	48	nt	nt	nt	nt	nt	nt
7	n/a	1288	Bp4165	447	swab; throat	wild type	no	nt	nt	+	+	nt	nt	256	1.5-2	0.38	2	nt	nt	wild type
8	n/a	1289	Bp6476	447	sputum	wild type	no	nt	nt	+	+	nt	nt	256	1.5-2	0.5-0.75	1.5-3	nt	nt	nt
9	n/a	1292	Bp6403	461	sputum	wild type	no	nt	nt	+	+	nt	nt	128	1.5	0.125-0.5	0.75	nt	nt	nt
10	n/a	1070	Bp6389	134	sputum	wild type	no	nt	nt	+	+	nt	nt	384	1	2-3	nt	nt	nt	nt
11	n/a	1043	Bp4160	0	swab; throat	wild type	yes	nt	nt	+	+	nt	nt	0.75	3	0.38	0.75	nt	nt	wild type
12	n/a	1049	Bp6368	52	sputum	wild type	no	nt	nt	+	+	nt	nt	nt	2	3-4	4	nt	nt	nt
13	n/a	1046	Bp6367	6	sputum	wild type	no	+	nt	+	+	+/-	-	nt	1.5	3-4	4-32	nt	nt	nt
14	n/a	1048	Bp4161	17	swab; throat	wild type	no	nt	nt	+	+	nt	nt	nt	2	2	6	nt	nt	wild type
15	n/a	1204	Bp6395	301	sputum	wild type	no	nt	nt	+	+	nt	nt	nt	1.5-2	6-8	nt	nt	nt	nt
16	n/a	1120	Bp6393	238	sputum	wild type	no	nt	nt	+	+	nt	nt	nt	2	6-8	nt	nt	nt	nt
17	n/a	1086	Bp6391	197	sputum	wild type	no	nt	nt	+	+	nt	nt	nt	2	12-16	nt	nt	nt	nt
18	n/a	1075	Bp6390	162	sputum	wild type	no	nt	nt	+	+	nt	nt	nt	2	6	6	nt	nt	nt
19	n/a	1285	Bp6400	395	mucous, nose	SCV	no	+	nt	+	+	+/-	++	nt	2-3	2	nt	nt	nt	nt
20	n/a	3104	Bp6470	395	mucous, nose	SCV	no	nt	nt	+	+	nt	nt	nt	3-4	8	nt	nt	nt	nt
21	n/a	3105	Bp6471	395	mucous, nose	SCV	no	nt	nt	+	+	nt	nt	nt	2	12-16	nt	nt	nt	nt
22	n/a	1284	Bp6399	395	mucous, nose	SCV	no	nt	nt	+	+	nt	nt	nt	2-3	4-6	nt	nt	nt	nt
23	n/a	1290	Bp4164	461	swab; throat	SCV	no	nt	nt	+	+	nt	nt	nt	1.5	8-12	3	nt	nt	wild type
24	n/a	1291	Bp6402	461	nasal	SCV	no	nt	nt	+	negative	nt	nt	nt	1.5-2	4	0.75	nt	nt	nt
25	n/a	1287	Bp6401	447	nasal	SCV	no	nt	nt	+	negative	nt	nt	96-192	2	4	1.5-3	nt	nt	nt
26	n/a	1360minor	Bp6408	548	sputum	nt	nt	nt	nt	nt	nt	nt	nt	nt	nt	nt	nt	nt	nt	nt
27	n/a	1459minor	Bp4167	855	sputum	nt	nt	nt	nt	nt	nt	nt	nt	nt	nt	nt	nt	nt	nt	nt
28	n/a	3103	Bp6469	301	sputum	SCV	no	nt	nt	negative	+	nt	nt	nt	1.5	6	nt	nt	nt	nt
29	n/a	1218	Bp4162	301	sputum	SCV	no	+	nt	negative	+	+/-	++	nt	1.5	12-16	1	8-12	0.38	wild type
30	n/a	1340	Bp6407	548	sputum	SCV	no	nt	nt	negative	+	nt	nt	512	1-1.5	4	1	nt	nt	nt
31	n/a	1360major	Bp6408	548	sputum	SCV	no	nt	nt	negative	+	nt	nt	nt	1.5-3	4	1	nt	nt	nt
32	n/a	1420	Bp6412	680	sputum	SCV	no	nt	nt	negative	+	nt	nt	nt	1.5-2	8-12	2	nt	nt	nt
33	n/a	1402	Bp6410	660	sputum	SCV	no	nt	nt	negative	+	nt	nt	nt	1.5-2	6	nt	nt	nt	nt
34	n/a	1418	Bp4166	680	sputum	SCV	no	nt	nt	negative	+	nt	nt	nt	1.5	8	3	nt	nt	No Ladder
35	n/a	1738	Bp6459	1190	sputum	SCV	no	nt	nt	negative	+	nt	nt	nt	2	12	3	nt	nt	nt
36	n/a	1784	Bp6460	1326	swab; throat	SCV	no	nt	nt	negative	+	nt	nt	192-256	2-3	6	2-3	nt	nt	nt
37	n/a	1459major	Bp4167	855	sputum	SCV	no	nt	nt	negative	failed test strip	nt	nt	nt	nt	4	3	nt	nt	No Ladder
38	n/a	1710	Bp6456	1134	lung; left lower	SCV	no	nt	nt	negative	+	nt	nt	128-384	2-3	12	2-3	nt	nt	No Ladder
39	n/a	3108	Bp6474	1134	lung; left lower	SCV	no	nt	nt	negative	+	nt	nt	nt	3	8	3	nt	nt	nt
40	n/a	1684	Bp6451	1134	lung; mid level lobe	SCV	no	nt	nt	negative	+	nt	nt	nt	2	12	nt	nt	nt	nt
41	n/a	1673	Bp6439	1134	lung; upper level bronchus	SCV	no	nt	nt	negative	+	nt	nt	nt	0.75-1	8-12	nt	nt	nt	nt
42	n/a	1670	Bp6436	1134	lung; upper level bronchus	SCV	no	nt	nt	negative	+	nt	nt	nt	0.75-1	24-48	1	nt	nt	nt
43	n/a	1660	Bp6426	1134	lung; bronchial wall	SCV	no	nt	nt	negative	+	nt	nt	nt	0.75-1	8	nt	nt	nt	No Ladder
44	n/a	3106	Bp6472	1134	lung; bronchial wall	SCV	no	nt	nt	negative	+	nt	nt	nt	1.5	64	nt	nt	nt	nt
45	n/a	1656	Bp6422	1134	swab; bronchi 2	SCV	no	nt	nt	negative	+	nt	nt	nt	0.75-1	6-8	nt	nt	nt	nt
46	n/a	1659	Bp6425	1134	lung; lower lobe	SCV	no	nt	nt	negative	+	nt	nt	nt	1.5	12	nt	nt	nt	No Ladder
47	n/a	1658	Bp6424	1134	inferior diaphragmatic surface	SCV	no	nt	nt	negative	+	nt	nt	nt	1.5	8	nt	nt	nt	nt
48	n/a	1464	Bp6415	905	sputum	SCV	no	+	+	negative	+	+/-	+/-	nt	3	6	6	nt	nt	nt
49	n/a	1648	Bp6420	1115	sputum	SCV	no	nt	nt	negative	+	nt	nt	nt	1.5	24	3	nt	nt	nt
50	n/a	1628	Bp6417	1037	swab; throat	SCV	no	nt	nt	negative	+	nt	nt	nt	2-3	8	6	nt	nt	No Ladder
51	n/a	1657	Bp6423	1134	inferior diaphragmatic surface	SCV	no	nt	nt	negative	+	nt	nt	nt	2	16	nt	nt	nt	No Ladder
52	n/a	1666	Bp6432	1134	lung; mid level lobe	SCV	no	nt	nt	negative	+	nt	nt	nt	1.5	32	nt	nt	nt	nt
53	n/a	1676	Bp6443	1134	lung; topmost lobe	SCV	no	nt	nt	negative	+	nt	nt	nt	2	24	nt	nt	nt	nt
54	n/a	1682	Bp6449	1134	lung; bronchial wall	SCV	no	nt	nt	negative	+	nt	nt	nt	1.5	4-6	2	nt	nt	nt
55	n/a	1680	Bp6447	1134	swab; bronchi 2	SCV	no	nt	nt	negative	+	nt	nt	nt	2	16	nt	nt	nt	nt
56	n/a	1679	Bp6446	1134	swab; bronchi 1	SCV	yes	nt	nt	negative	+	nt	nt	nt	2	24	nt	nt	nt	nt
57	n/a	1681	Bp6448	1134	inferior diaphragmatic surface	SCV	no	nt	nt	negative	+	nt	nt	192-512	2-3	8	nt	nt	nt	nt
58	n/a	1688	Bp6453	1134	lung; upper level bronchus	SCV	yes	nt	nt	negative	+	nt	nt	nt	2-3	12	3	nt	nt	nt
59	n/a	1649	Bp6457	1134	bronchial lavage	SCV	no	nt	nt	negative	+	nt	nt	nt	1.5	16	2	nt	nt	nt
60	n/a	1665	Bp6431	1134	lung; mid level lobe	SCV	no	nt	nt	negative	+	nt	nt	nt	1.5	48	nt	nt	nt	nt
61	n/a	1685	Bp6452	1134	lung; mid level lobe	SCV	yes	nt	nt	negative	+	nt	nt	nt	2	4	nt	nt	nt	nt
62	n/a	1689	Bp6454	1134	lung; topmost lobe	SCV	yes	nt	nt	negative	+	nt	nt	nt	2	12	2	nt	nt	nt
63	n/a	1690	Bp6455	1134	lung; main lower lobe bronchus	SCV	yes	nt	nt	negative	+	nt	nt	nt	2	16	4	nt	nt	nt
64	n/a	1629	Bp6418	1037	swab; throat	SCV	no	nt	nt	negative	+	nt	nt	nt	2-3	6	6	nt	nt	No Ladder
65	n/a	1664	Bp6430	1134	lung; mid level lobe	SCV	no	nt	nt	negative	+	nt	nt	nt	1-1.5	8	nt	nt	nt	nt
66	n/a	1661	Bp6427	1134	lung; bronchial wall	SCV	no	nt	nt	negative	+	nt	nt	nt	1.5	8	nt	nt	nt	nt
67	n/a	1655	Bp6340	1134	swab; bronchi 1	SCV	no	nt	nt	negative	+	nt	nt	nt	2	12	nt	nt	nt	No Ladder
68	n/a	1675	Bp6441	1134	lung; topmost lobe	SCV	no	nt	nt	negative	+	nt	nt	nt	3	8	nt	nt	nt	nt
69	n/a	3107	Bp6473	1134	lung; chalky material lower lobe	SCV	no	nt	nt	negative	+	nt	nt	nt	3	64	nt	nt	nt	nt
70	n/a	1662	Bp6428	1134	lung; chalky material lower lobe	SCV	no	nt	nt	negative	+	nt	nt	nt	2	24	nt	nt	nt	No Ladder
71	1	1687	Bp6442	1134	lung; upper level bronchus	SCV	yes	nt	nt	negative	+	nt	nt	nt	2-3	6-8	1.5	nt	nt	nt
72	1	1821	Bp4169	1338	sputum	SCV	no	nt	nt	negative	+	nt	nt	nt	1.5	8-12	1.5	1	nt	No Ladder
73	1	4637	Bp6612	3696	sputum	SCV	no	nt	nt	negative	+	nt	nt	nt	nt	nt	nt	nt	nt	nt
74	1	6671	Bp8772	4235	sputum	nt	nt	nt	nt	nt	nt	nt	nt	nt	nt	nt	nt	nt	nt	nt
75	1	6686	Bp8774	4235	sputum	nt	nt	nt	nt	nt	nt	nt	nt	nt	nt	nt	nt	nt	nt	nt
76	1	6889	Bp8775	4235	sputum	nt	nt	nt	nt	nt	nt	nt	nt	nt	nt	nt	nt	nt	nt	nt
77	1	7732	Bp7221	4560	sputum	SCV	no	nt	nt	negative	+	nt	nt	nt	nt	nt	nt	nt	nt	nt
78	1	6672	Bp8773	4235	sputum	nt	nt	nt	nt	nt	nt	nt	nt	nt	nt	nt	nt	nt	nt	nt
79	1	6891	Bp8777	4237	sputum	nt	nt	nt	nt	nt	nt	nt	nt	nt	nt	nt	nt	nt	nt	nt
80	1	1713	Bp6458	1156	sputum	SCV	nt	+	+	negative	+	+/-	+/-	nt	2-4	12-16	16	nt	nt	No Ladder
81	1	7744	Bp7233	4560	sputum	SCV	no	negative	nt	negative	+	nt	nt	nt	nt	nt	nt	nt	nt	nt
82	1	9790	Bp8953	5867	sputum	nt	nt	nt	nt	nt	nt	nt	nt	nt	nt	nt	nt	nt	nt	nt
83	1	9791	Bp8954	5867	sputum	nt	nt	nt	nt	nt	nt	nt	nt	nt	nt	nt	nt	nt	nt	nt
84	1	9509	Bp8939	5867	sputum	nt	nt	nt	nt	nt	nt	nt	nt	nt	nt	nt	nt	nt	nt	nt
85	1	9787	Bp8950	5867	sputum	nt	nt	nt	nt	nt	nt	nt	nt	nt	nt	nt	nt	nt	nt	nt
86	1	7734	Bp7223	4560	sputum	SCV	yes	nt	nt	negative	+	nt	nt	nt	nt	nt	nt	nt	nt	nt
87	1	7740	Bp7229	4560	sputum	SCV	yes	nt	nt	negative	+	nt	nt	nt	nt	nt	nt	nt	nt	nt
88	1	9511	Bp8941	5867	sputum	nt	nt	nt	nt	nt	nt	nt	nt	nt	nt	nt	nt	nt	nt	nt
89	1	9788	Bp8951	5867	sputum	nt	nt	nt	nt	nt	nt	nt	nt	nt	nt	nt	nt	nt	nt	nt
90	1	9789	Bp8952	5867	sputum	nt	nt	nt	nt	nt	nt	nt	nt	nt	nt	nt	nt	nt	nt	nt
91	2	1627	Bp6416	1037	sputum	SCV	no	nt	nt	negative	+	nt	nt	nt	4-6	12	6	nt	nt	nt
92	2	1630	Bp6419	1037	swab; nose	SCV	no	nt	nt	negative	+	nt	nt	nt	2-3	12	6	nt	nt	No Ladder
93	2	1668	Bp6434	1134	lung; upper level bronchus	SCV	no	nt	nt	negative	+	nt	nt	nt	3	16-24	2	nt	nt	No Ladder
94	2	1667	Bp6433	1134	lung; mid level lobe	SCV	no	nt	nt	negative	+	nt	nt	nt	6	32	nt	nt	nt	nt
95	2	1669	Bp6435	1134	lung; upper level bronchus	SCV	no	nt	nt	negative	+	nt	nt	nt	2-3	32	2	nt	nt	nt
96	2	1663	Bp6429	1134	lung; mid level lobe	SCV	no	nt	nt	negative	+	nt	nt	nt	3	32	nt	nt	nt	No Ladder
97	2	1674	Bp6440	1134	lung; upper level bronchus	SCV	no	nt	nt	negative	+	nt	nt	nt	3	24-32	nt	nt	nt	nt
98	2	3109	Bp6475	1156	sputum	SCV	no	nt	nt	negative	+	nt	nt	nt	2	16-24	6	nt	nt	nt
99	2	1686	Bp4168	v	lung; mid level lobe	SCV	no	nt	nt	negative	+	nt	nt	nt	nt	16	32 halo	nt	nt	nt
100	2	1672	Bp6438	1134	lung; upper level bronchus	SCV	no	nt	nt	negative	+	nt	nt	nt	3-4	8-12	nt	nt	nt	nt
101	2	1671	Bp6437	1134	lung; upper level bronchus	SCV	no	nt	nt	negative	+	nt	nt	nt	2-4	8-12	3	nt	nt	nt
102	2	1677	Bp6444	1134	lung; main lower lobe bronchus	SCV	no	nt	nt	negative	+	nt	nt	nt	4	48	nt	nt	nt	nt
103	2	1678	Bp6445	1134	swab; bronchi 1	SCV	no	nt	nt	negative	+	nt	nt	nt	3	32-48	nt	nt	nt	nt
104	2	1683	Bp6450	1134	lung; chalky material lower lobe	SCV	no	nt	nt	negative	+	nt	nt	nt	3	16	3	nt	nt	nt
105	2	2408	Bp4170	2175	sputum	SCV	yes	nt	nt	negative	negative	nt	nt	nt	1-1.5	16	halo	nt	nt	nt
106	2	3042	Bp4171	2863	sputum	SCV	no	nt	nt	negative	+	nt	nt	nt	3	3	1.5	nt	nt	No Ladder
107	2	3030	Bp6468	2790	sputum	SCV	no	nt	nt	negative	+	nt	nt	nt	1.5	24	nt	nt	nt	nt
108	2	4638	Bp6613	3696	sputum	SCV	no	nt	nt	negative	+	nt	nt	nt	nt	nt	nt	nt	nt	nt
109	2	7729	Bp7218	4560	sputum	SCV	no	nt	nt	negative	+	nt	nt	nt	nt	nt	nt	nt	nt	nt
110	2	7730	Bp7219	4560	sputum	SCV	no	nt	nt	negative	+	nt	nt	nt	nt	nt	nt	nt	nt	nt
111	2	7735	Bp7224	4560	sputum	SCV	no	nt	nt	negative	+	nt	nt	nt	nt	nt	nt	nt	nt	nt
112	2	7741	Bp7230	4560	sputum	fastidious	no	nt	nt	negative	+	nt	nt	nt	nt	nt	nt	nt	nt	nt
113	2	7731	Bp7220	4560	sputum	fastidious	no	nt	nt	negative	+	nt	nt	nt	nt	nt	nt	nt	nt	nt
114	2	7733	Bp7222	4560	sputum	fastidious	no	nt	nt	negative	+	nt	nt	nt	nt	nt	nt	nt	nt	nt
115	2	7743	Bp7232	4560	sputum	fastidious	no	nt	nt	negative	+	nt	nt	nt	nt	nt	nt	nt	nt	nt
116	2	7745	Bp7234	4560	sputum	fastidious	no	nt	nt	negative	+	nt	nt	≥1024	nt	nt	nt	nt	nt	nt
117	2	7726	Bp7215	4560	sputum	fastidious	no	nt	nt	negative	+	nt	nt	≥1024	nt	nt	nt	nt	nt	nt
118	2	7727	Bp7216	4560	sputum	fastidious	no	nt	nt	negative	+	nt	nt	nt	nt	nt	nt	nt	nt	nt
119	2	7728	Bp7217	4560	sputum	fastidious	no	nt	nt	negative	+	nt	nt	nt	nt	nt	nt	nt	nt	nt
120	2	7736	Bp7225	4560	sputum	fastidious	no	+	negative	negative	+	+/-	-	nt	nt	nt	nt	nt	nt	nt
121	2	7737	Bp7226	4560	sputum	fastidious	no	nt	nt	negative	+	nt	nt	nt	nt	nt	nt	nt	nt	nt
122	2	7738	Bp7227	4560	sputum	fastidious	no	nt	nt	negative	+	nt	nt	nt	nt	nt	nt	nt	nt	nt
123	2	7739	Bp7228	4560	sputum	fastidious	no	nt	nt	negative	+	nt	nt	nt	nt	nt	nt	nt	nt	nt
124	2	7742	Bp7231	4560	sputum	fastidious	no	nt	nt	negative	+	nt	nt	nt	nt	nt	nt	nt	nt	nt
125	2	9510	Bp8940	5867	sputum	nt	nt	nt	nt	nt	nt	nt	nt	nt	nt	nt	nt	nt	nt	nt
126	2	9786	Bp8949	5867	sputum	nt	nt	nt	nt	nt	nt	nt	nt	nt	nt	nt	nt	nt	nt	nt
aDay of first isolate collected is given as day 0.
bMotility was assessed using motility test medium with triphenyltetrazolium chloride (TTC) indicator (Hardy Diagnostics, CA).
cCPS (capsular polysaccharide) was performed using the Active Melioidosis DetectTM Rapid Test by InBiOS (Seattle, WA).
dWestern analysis as determined in Settles et al unpublsihed data (++ very high production, + easily detected, +/- barely detected by western analysis, - not detected by western analysis)
eAssessed using E-Test strips (Biomérieux, France); for some isolates multiple colonies were tested independently, yielding different MICs, for these cases the range of MICs is listed.
fAssessed using E-Test strips (Biomérieux, France); for some isolates bioreplicates were tested independently, yielding different MICs, for these cases the range of MICs is listed.
gLPS production as determined in Tuanyok et al., 2012
Abbreviations: n/a, not applicable; MSHR, Menzies School of Health Research; NAU, Northern Arizona University; GM, gentamicin; SCV, small colony variant; nt, not tested; MIC, minimum inhibitory concentration
Shading for antibiotic testing: grey shading = susceptible; yellow shading/brown text = intermediate; pink shading/red text = resistant; no shading = not tested
